# Supplementary material for: In Silico Bioinformatics Followed by Molecular Validation Using Archival FFPE Tissue Biopsies Identifies a Panel of Transcripts Associated with Severe Asthma and Lung Cancer
Source: MDPI journal article supplement (doi:10.3390/cancers14071663), 2022-03-25
Supplement: s1 [file s1]

**Supplementary data 1. Clinical characteristics of the datasets included in the survival analysis(19).**

| Dataset                       | Platform                | Age    | Sex (% male) | % of never smokers | Histology (% A/S/L) | Stage (% 1/2/3/4) |
|-------------------------------|-------------------------|--------|--------------|--------------------|---------------------|-------------------|
| <a href="#">GSE4573</a> (28)  | <a href="#">GPL96</a>   | 67±9.8 | 63%          | 3.10%              | 0/100/0             | 56/26/18/0        |
| <a href="#">GSE14814</a> (24) | <a href="#">GPL96</a>   | 62±8.5 | 74%          | -                  | 31/58/11            | 50/50/0/0         |
| <a href="#">GSE8894</a> (27)  | <a href="#">GPL570</a>  | 62±10  | 75%          | -                  | 46/54/0             | -                 |
| <a href="#">GSE19188</a> (25) | <a href="#">GPL570</a>  | -      | 75%          | -                  | 49/30/21            | -                 |
| <a href="#">GSE3141</a> (29)  | <a href="#">GPL570</a>  | -      | -            | -                  | 52/48/0             | -                 |
| <a href="#">GSE31210</a> (21) | <a href="#">GPL570</a>  | 60±8.1 | 47%          | 50%                | 100/0/0             | 74/26/0/0         |
| CaArray (26)                  | <a href="#">GPL96</a>   | 64±10  | 51%          | 14%                | -                   | -                 |
| TCGA(22)                      | <a href="#">GPL3921</a> | 66±9.3 | 67%          | 7.50%              | 0/100/0             | -                 |
| <a href="#">GSE29013</a> (23) | <a href="#">GPL570</a>  | 64±8.7 | 69%          | 3.60%              | 55/45/0             | 44/25/31/0        |
| <a href="#">GSE37745</a> (20) | <a href="#">GPL570</a>  | 64±9.2 | 55%          | -                  | 54/37/12            | 66/18/14/2        |
| <u>Entire Data Sets</u>       |                         | 64±10  | 58%          | 17.80%             | 50/45/5             | 63/27/10/1        |
