# Supplementary material for: In Silico Bioinformatics Followed by Molecular Validation Using Archival FFPE Tissue Biopsies Identifies a Panel of Transcripts Associated with Severe Asthma and Lung Cancer
Source: MDPI journal article supplement (doi:10.3390/cancers14071663), 2022-03-25
Supplement: s1 [file s1]

Supplementary Table S1. List of primers used to validate the genes by RT-qPCR

| Gene  | Primer  | Primer Sequence (5' to 3') | Product length (bp) | NM accession number |
|-------|---------|----------------------------|---------------------|---------------------|
| POSTN | Forward | TCCTAATGGGGTTGTCACTGT      | 99                  | NM_006475.3         |
|       | Reverse | TGTGTAAGCACACGGTCAATG      |                     |                     |
| LUM   | Forward | CCTGGAGGTCAATCAACTTGAGA    | 100                 | NM_002345.4         |
|       | Reverse | GCCATCCAAACGCAAATGCT       |                     |                     |
| STAT1 | Forward | CTTGATCAGCTGCAGAACT        | 115                 | NM_007315.4         |
|       | Reverse | AGGGTCATGTTTCGTAGGTGT      |                     |                     |
| CD44  | Forward | GGACAAGTTTTGGTGGCACG       | 100                 | NM_000610.4         |
|       | Reverse | GAATACACCTGCAAAGCGGC       |                     |                     |
| BCL3  | Forward | ACGCAGTGGACATTAAGAGC       | 118                 | NM_005178.5         |
|       | Reverse | GAGTACATTTGCGCGTTCAC       |                     |                     |
| FOSB  | Forward | GGAGCTGACCGACCGACT         | 113                 | NM_006732.3         |
|       | Reverse | GCACAAACTCCAGACGTTTCCT     |                     |                     |
| MYC   | Forward | CTCCGTCCTCGGATTCTC         | 120                 | NM_002467.6         |
|       | Reverse | CTTGTCCTCCTCAGAGT          |                     |                     |
| PPARD | Forward | CATGACC AAAAAGAAGGCCCG     | 101                 | NM_006238.5         |
|       | Reverse | CCTTCTCTGCCTGCCACAAT       |                     |                     |
| 18S   | Forward | TGACTCAACACGGGAAACC        | 114                 | NR_003286           |
|       | Reverse | TCGCTCCACCAACTAAGAAC       |                     |                     |

Supplementary Table S2. List of common pathways identified between GSEA and Metascape analysis in Severe asthma set

| <b>Common pathways in Asthmatics identified by GSEA and metascape analysis</b> |
|--------------------------------------------------------------------------------|
| positive regulation of cell adhesion                                           |
| regulation of cell adhesion                                                    |
| reactive oxygen species metabolic process                                      |
| anion transport                                                                |
| urogenital system development                                                  |
| glycoprotein metabolic process                                                 |
| metal ion homeostasis                                                          |
| nephron development                                                            |
| organic anion transport                                                        |
| gland development                                                              |
| regulation of cell morphogenesis                                               |
| connective tissue development                                                  |
| sensory system development                                                     |
| epithelial cell proliferation                                                  |

Supplementary Table S3. Table for mean expression values and fold change obtained for the eight genes from Microarray analysis for Asthmatics, Lung cancer and Healthy controls (Mann–Whitney test, significance  $P < 0.05$ )

| Gene  | Asthma (AS) vs Healthy |         | Lung Cancer (LC) vs Healthy |         | AS vs LC |
|-------|------------------------|---------|-----------------------------|---------|----------|
|       | Log Fold Change        | P value | Log Fold Change             | P value | P value  |
| BCL3  | 1.961                  | 0.9826  | 2.683                       | <0.0001 | <0.0001  |
| CD44  | 2.648                  | 0.0002  | 3.316                       | <0.0001 | <0.0001  |
| FOSB  | 2.629                  | 0.0078  | 2.086                       | 0.6761  | 0.0004   |
| LUM   | -0.010                 | 0.0409  | 2.733                       | <0.0001 | <0.0001  |
| MYC   | 2.205                  | 0.6019  | 2.441                       | <0.0001 | 0.0055   |
| PPARD | 1.950                  | 0.5218  | 3.429                       | <0.0001 | <0.0001  |
| POSTN | 2.263                  | 0.0010  | 2.409                       | <0.0001 | 0.3132   |
| STAT1 | 2.504                  | 0.0027  | 3.202                       | <0.0001 | <0.0001  |

Supplementary Table S4. Table for gene frequency from GSEA analysis for Asthmatics and Lung cancer Vs Healthy controls

| Gene  | Frequency from GSEA |             |
|-------|---------------------|-------------|
|       | Asthma              | Lung cancer |
| BCL3  | 9                   | 11          |
| CD44  | 8                   | 7           |
| FOSB  | 7                   | 7           |
| LUM   | 2                   | 2           |
| MYC   | 6                   | 7           |
| PPARD | 16                  | 12          |
| POSTN | 6                   | 4           |
| STAT1 | 6                   | 5           |

Supplementary Table S5. Table for fold change obtained for the eight genes from RT-qPCR analysis for FFPE from Asthmatics (AS), Lung cancer (LC) and Asthmatics with Lung cancer (AC) (Mann–Whitney test ,significance  $P<0.05$ )

| Gene  | Asthma (AS)     | Asthma with Lung cancer (AC) | Lung Cancer (LC) | P value  |          |          |
|-------|-----------------|------------------------------|------------------|----------|----------|----------|
|       | Log Fold Change | Log Fold Change              | Log Fold Change  | AS Vs LC | AS Vs AC | LC Vs AC |
| BCL3  | 0.271           | 1.475                        | 1.404            | 0.125    | 0.922    | 0.120    |
| CD44  | 0.276           | 0.531                        | 1.379            | 0.023    | 0.563    | 0.080    |
| FOSB  | 0.485           | 0.314                        | 1.260            | 0.046    | 0.642    | 0.029    |
| LUM   | 0.284           | 1.684                        | 1.894            | 0.008    | 0.022    | 0.682    |
| MYC   | 0.516           | 0.120                        | 1.431            | 0.006    | 0.174    | 0.001    |
| PPARD | 0.210           | 1.924                        | 1.688            | 0.026    | 0.106    | 0.808    |
| POSTN | 0.116           | 1.221                        | 1.460            | 0.041    | 0.101    | 0.700    |
| STAT1 | 0.353           | 1.069                        | 1.493            | 0.0001   | 0.004    | 0.048    |

Supplementary Table S6. Table for log fold change obtained for the eight genes from RT-qPCR analysis for plasma samples Asthmatics (AS), Lung cancer (LC) (Mann–Whitney test, significance  $P<0.05$ )

| Gene  | Asthma (AS)     | Lung Cancer (LC) | P value |
|-------|-----------------|------------------|---------|
|       | Log fold Change | Log fold Change  |         |
| BCL3  | -0.103          | 0.889            | 0.024   |
| CD44  | 0.108           | 1.446            | <0.0001 |
| FOSB  | -0.295          | -1.085           | 0.104   |
| PPARD | -0.243          | 2.318            | 0.000   |
| POSTN | -0.152          | 1.840            | 0.000   |
| STAT1 | -0.017          | 1.776            | <0.0001 |

Supplementary Table S7. The sample size and log-p rank value from KM Plot for the eight genes identified from in silico analysis for Asthmatics, Lung cancer and Healthy controls

| Gene  | Affymetrix ID | Low expression sample size | High expression sample size | Log Rank P value |
|-------|---------------|----------------------------|-----------------------------|------------------|
| POSTN | 155577_at     | 577                        | 567                         | 3.7e-06          |
| LUM   | 201744_s_at   | 963                        | 962                         | 3.8e-05          |
| BCL3  | 204907_s_at   | 964                        | 961                         | 3.6e-05          |
| PPARD | 208044_s_at   | 962                        | 963                         | 4.1e-05          |
| CD44  | 1557905_s_at  | 572                        | 572                         | 0.088            |
| MYC   | 202431_s_at   | 962                        | 963                         | 5.8e-06          |
| FOSB  | 202768_at     | 966                        | 959                         | 0.0013           |
| STAT1 | 209969_s_at   | 962                        | 963                         | 0.84             |

Supplementary Table S8. Table for log fold change obtained for the eight genes from RT-qPCR analysis for cell lines from Asthmatics (AS) and Lung cancer (LC) patients

| Gene  | Asthmatic cells |        |        | Lung cancer cells |         |        |
|-------|-----------------|--------|--------|-------------------|---------|--------|
|       | DHBE            | S13    | S14    | A549              | SK-Lu-1 | Calu3  |
| BCL3  | 0.010           | -0.094 | -0.579 | 0.402             | 0.296   | 0.308  |
| CD44  | -0.057          | -0.096 | -0.142 | 0.374             | 0.274   | 0.192  |
| FOSB  | 0.335           | -0.005 | -0.330 | 1.761             | 1.229   | 0.014  |
| PPARD | 0.004           | -0.247 | -0.009 | 0.276             | 0.323   | 0.332  |
| POSTN | 0.021           | 0.718  | -0.718 | -0.720            | -0.358  | -2.104 |
| STAT1 | 0.010           | -0.067 | 0.033  | 0.313             | 0.207   | 0.141  |

Supplementary Table S9: Mortality Risk for Increased gene expression as per sex, smoking history, cancer stage among lung cancer survival cohorts.

| Probe ID       | Gene Symbol | Sex    | smoking      | Cancer Stage | Log rank P-Value |
|----------------|-------------|--------|--------------|--------------|------------------|
| Increased Risk |             |        |              |              |                  |
| 204908 s at    | BCL3        | Female | Never Smoked | Stage 1      | 0.0053           |
| 204908 s at    | BCL3        | Male   | Smoker       | Stage 1      | 0.014            |
| 208044 s at    | PPARD       | Male   | Smoker       | Stage 1      | 0.048            |
| 202431 s at    | MYC         | Male   | Smoker       | Stage 1      | 0.011            |
| Decreased Risk |             |        |              |              |                  |
| 1555777 at     | POSTN       | Male   | Never Smoked | Stage 1      | 0.019            |
| 202768 at      | FOSB        | Male   | Never Smoked | Stage 1      | 0.031            |
| 202768 at      | FOSB        | Male   | Smoker       | Stage 1      | 0.0079           |
| 201744 s at    | LUM         | Male   | Never Smoked | Stage 1      | 0.031            |
| 201744 s at    | LUM         | Male   | Smoker       | Stage 1      | 0.0036           |
| 201744 s at    | LUM         | Female | Smoker       | Stage 2      | 0.023            |
| 201744 s at    | LUM         | Male   | Smoker       | Stage 2      | 0.031            |
